# Supplementary material for: The impact of insecticide resistance on Culex pipiens immunity
Source: PubMed Central journal article supplement (PMC3673477; doi:10.1111/eva.12037), 2012-12-11

# Supplementary Information

## Figure 1

A)

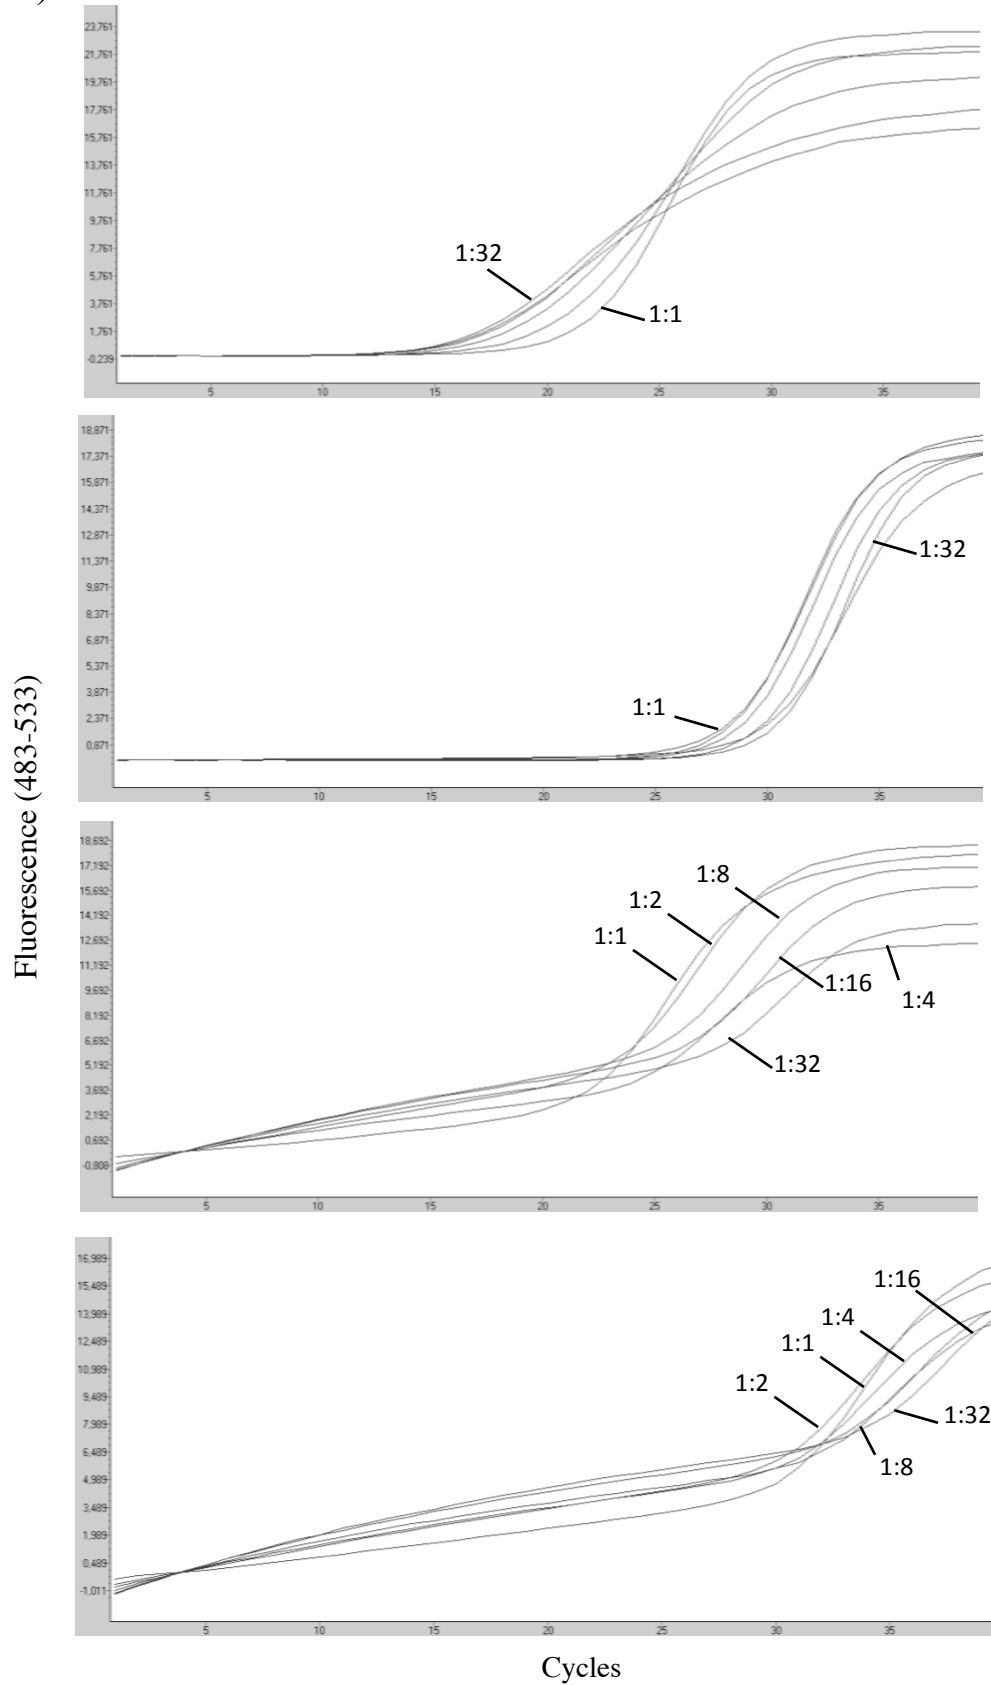

# Supplementary Information

## Figure 1

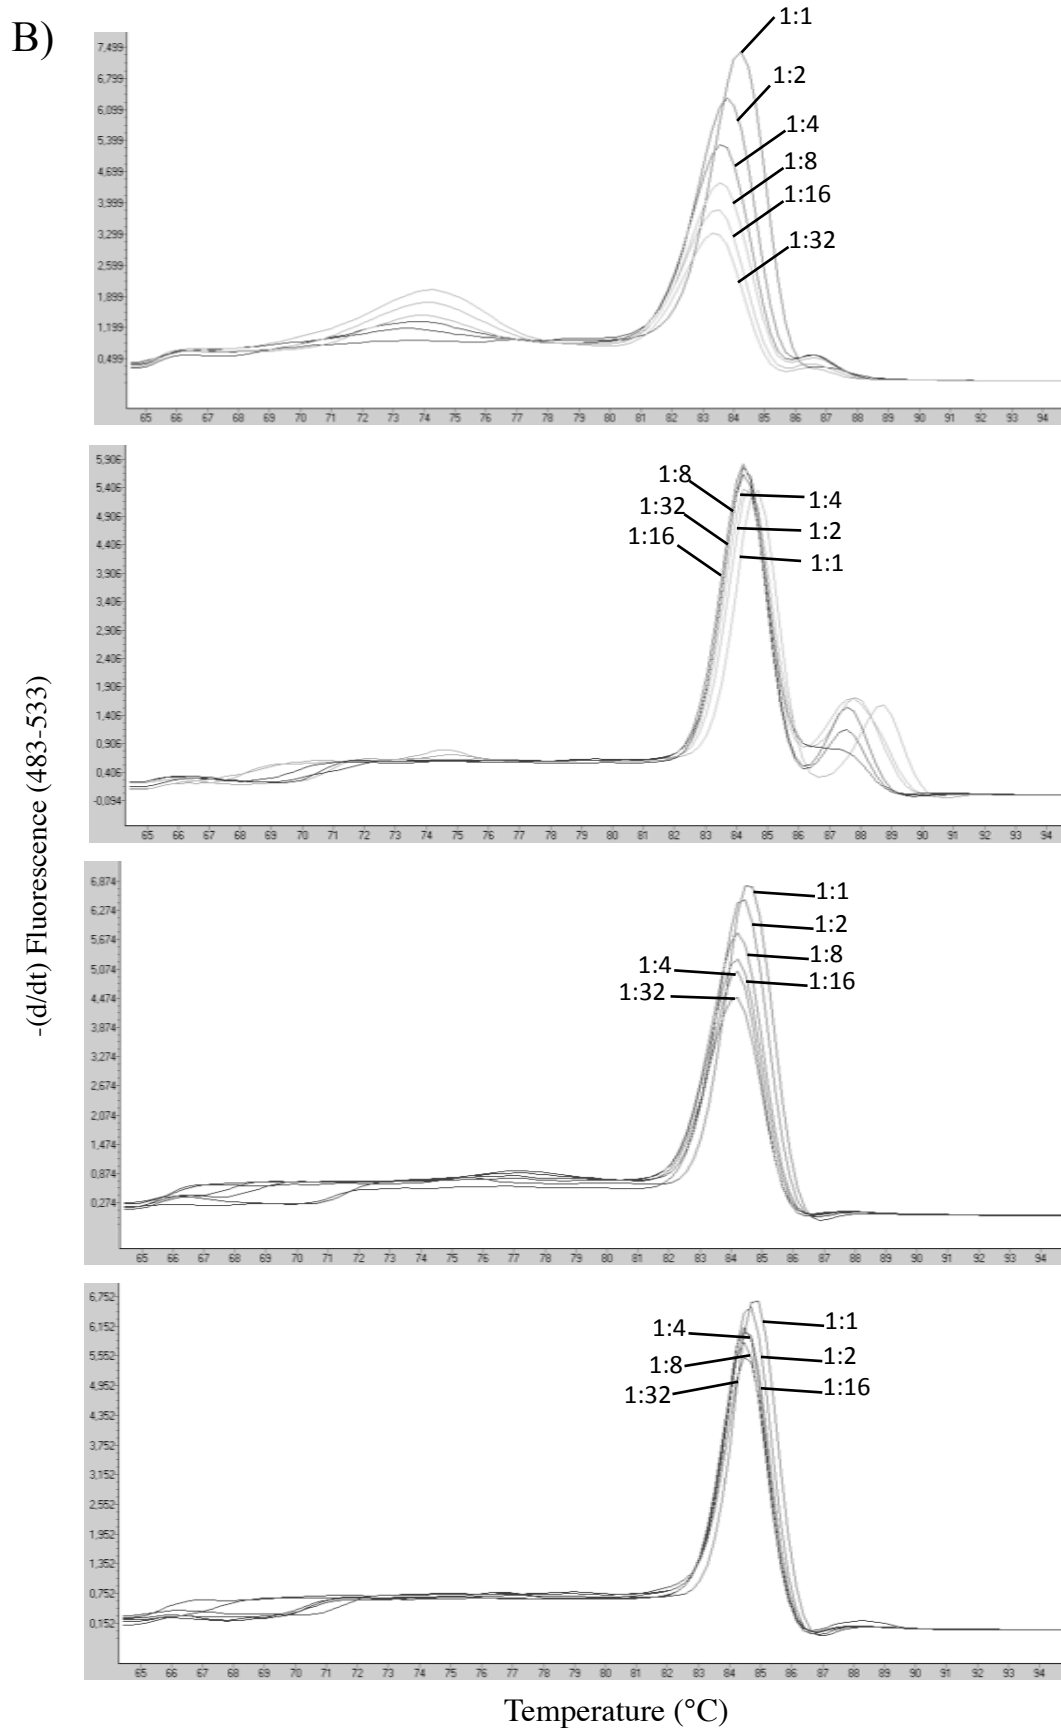

# Supplementary Information

## Figure 2

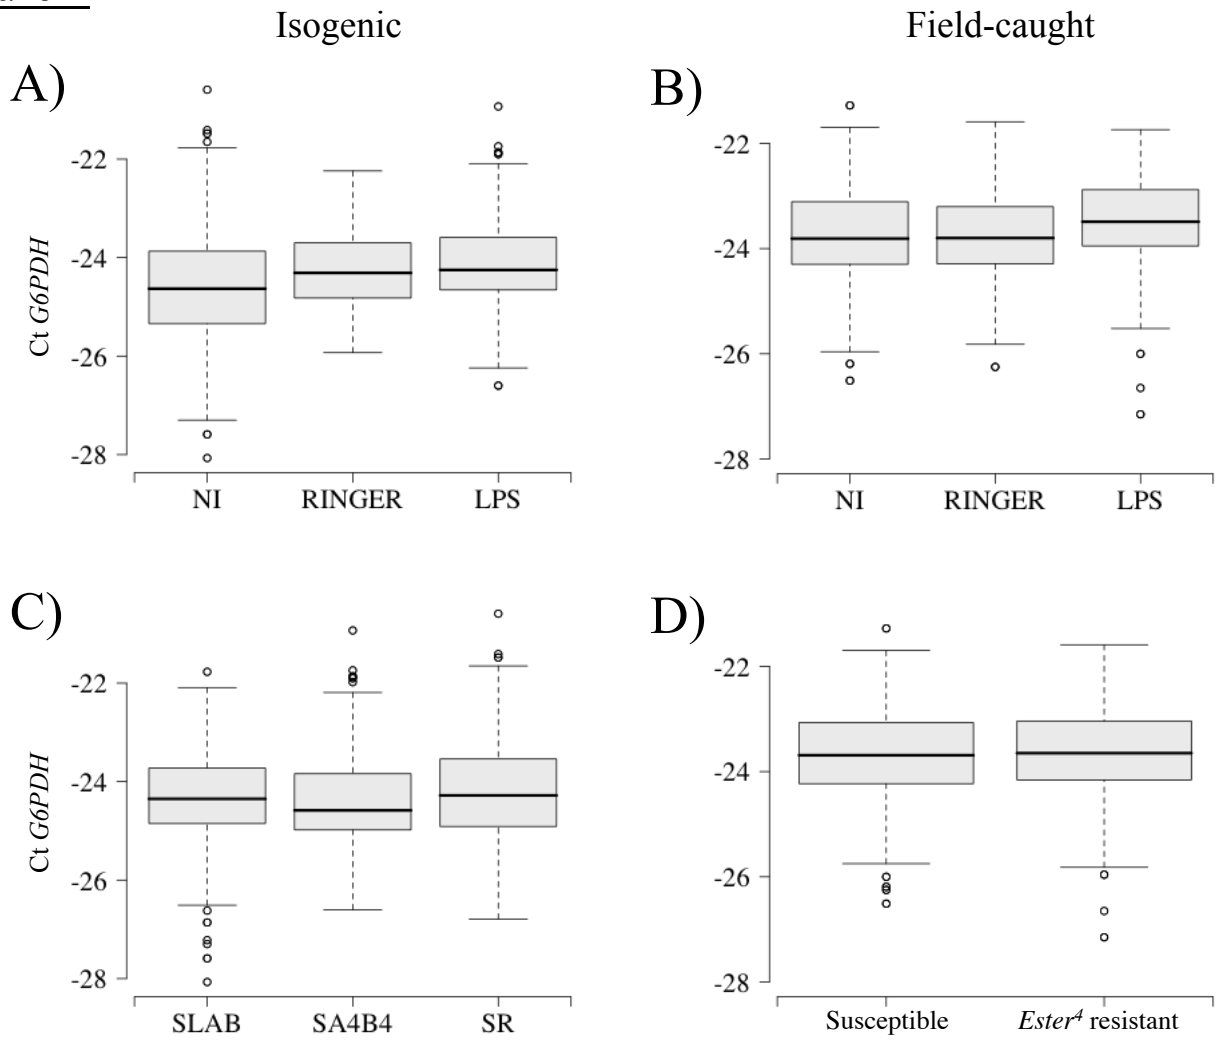

Supplement: eva0006-0497-sd1.pdf [file eva0006-0497-sd1.pdf]
